# Supplementary material for: Phase transition and electrochemical properties of S-functionalized MXene anodes for Li-ion batteries: a first-principles investigation
Source: Royal Society of Chemistry journal article supplement (doi:10.1039/d4cp01928h), 2024-01-01
Supplement: d4cp01928h2.pdf [file d4cp01928h2.pdf]

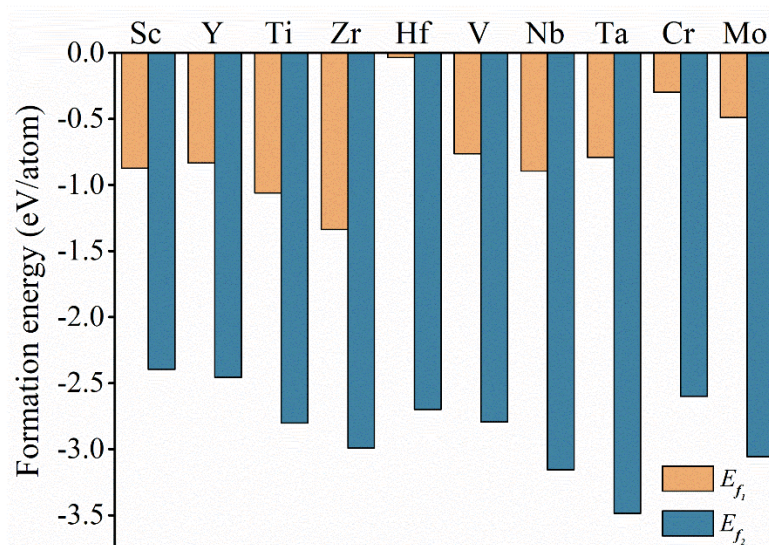

Fig. S1 Calculated formation energies of the most stable  $M_2CS_2$ .

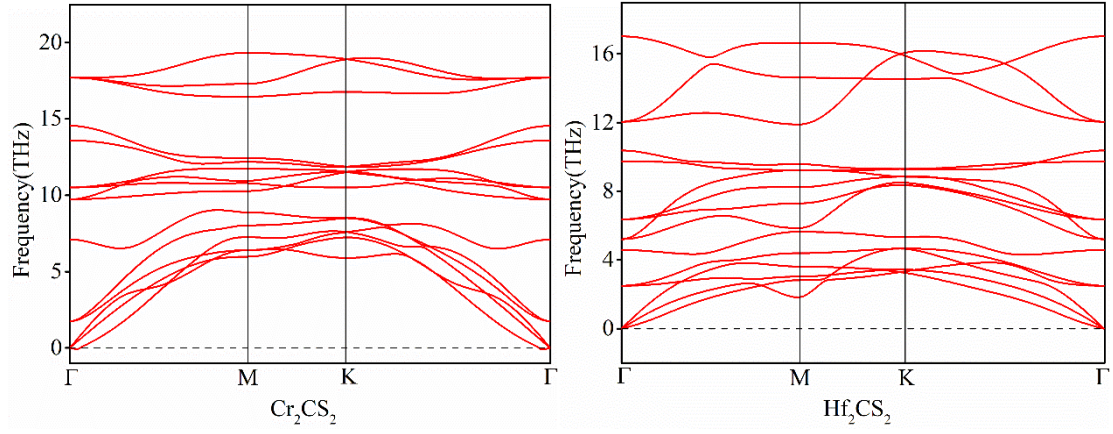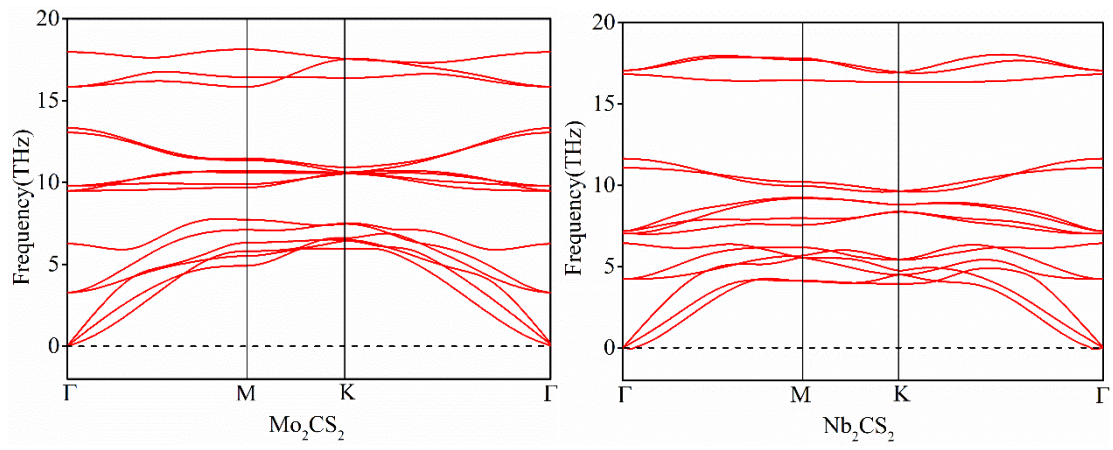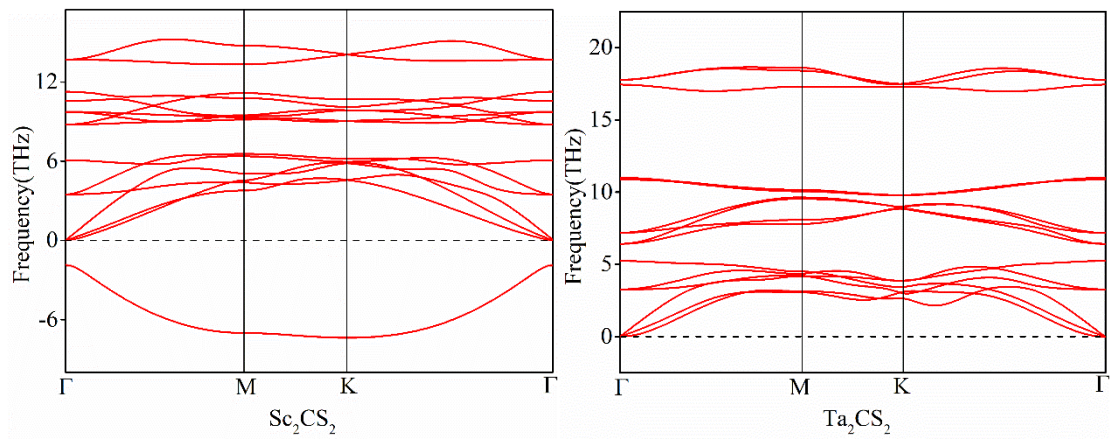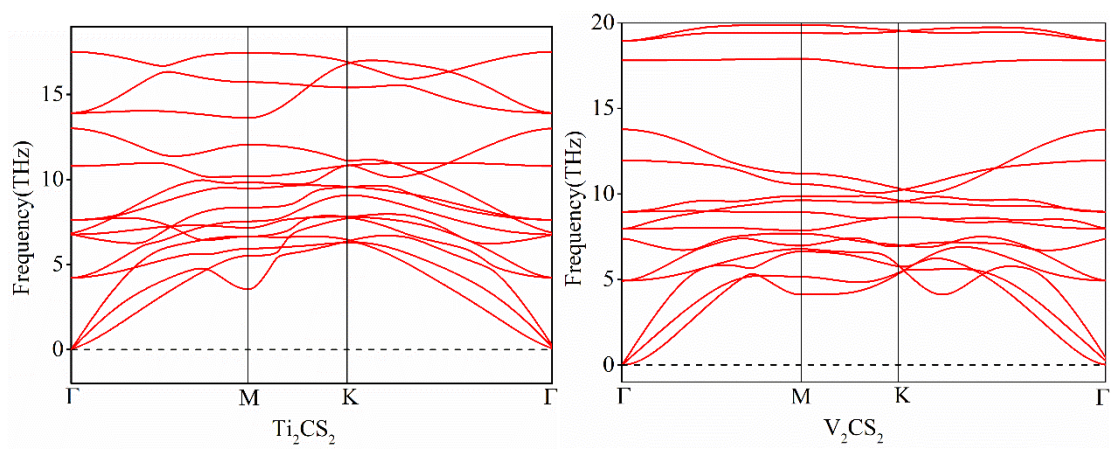

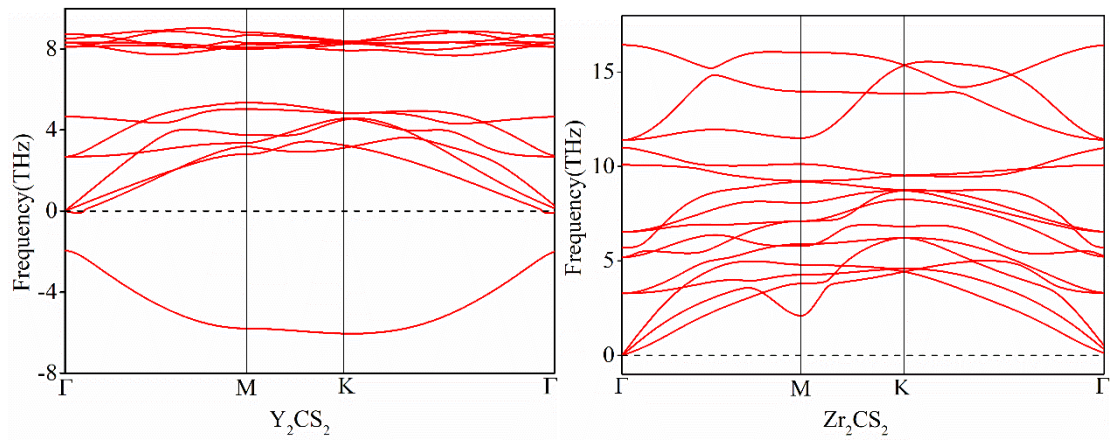

Fig. S2 Phonon dispersion curves for the most stable  $M_2CS_2$ .

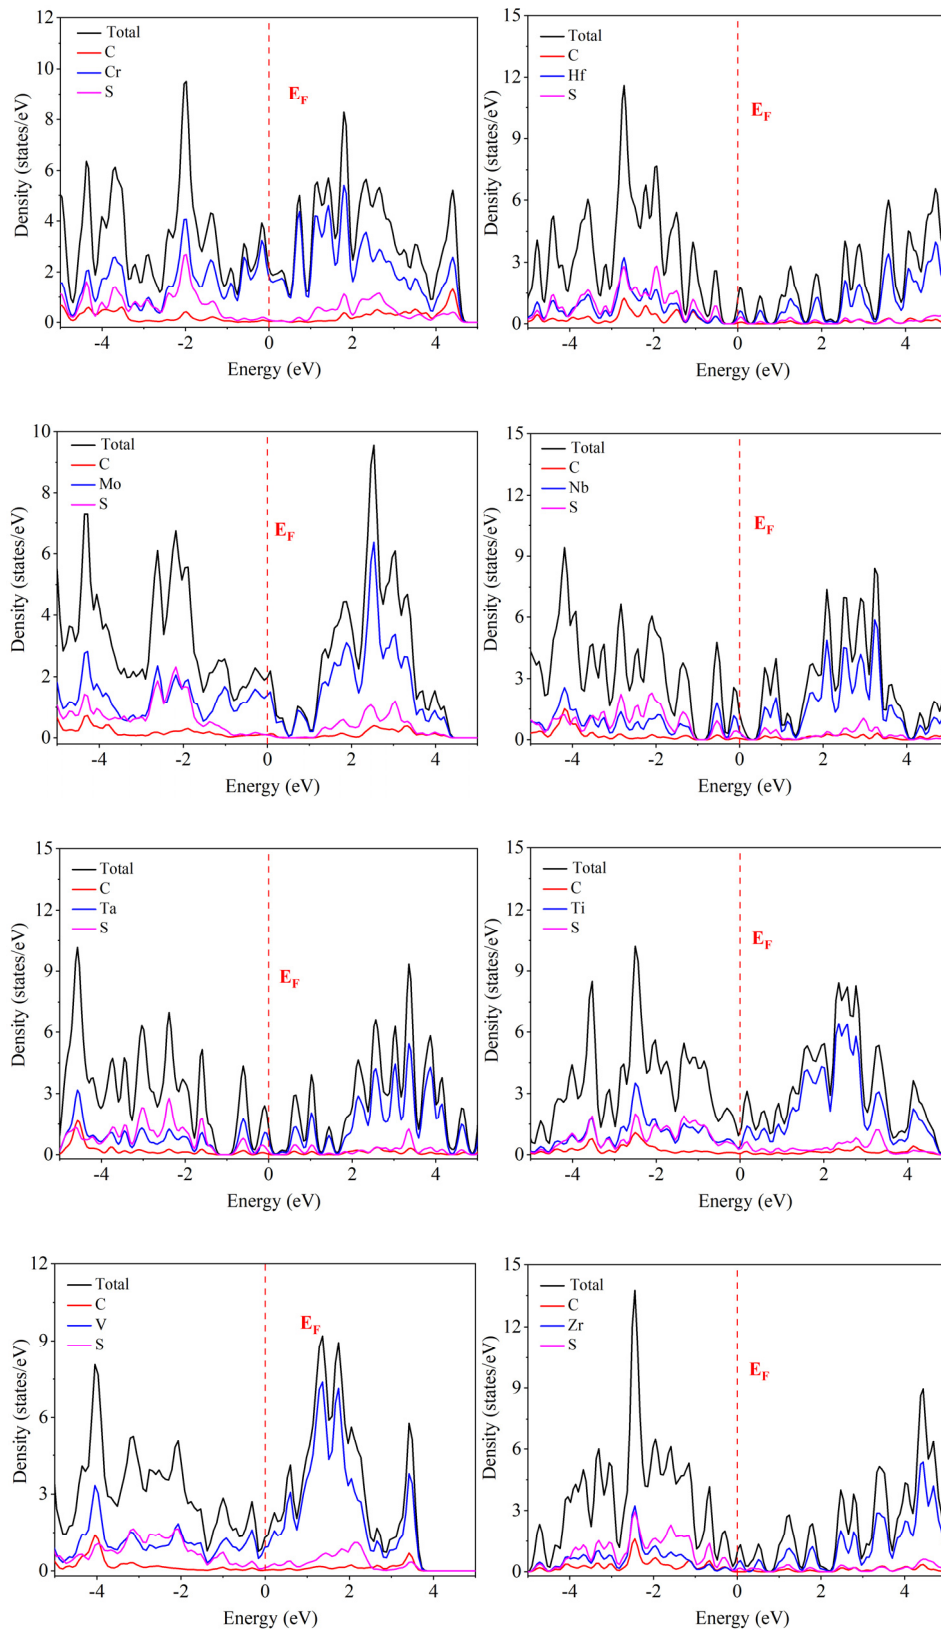

Fig. S3 Total and partial density of states of  $M_2CS_2$

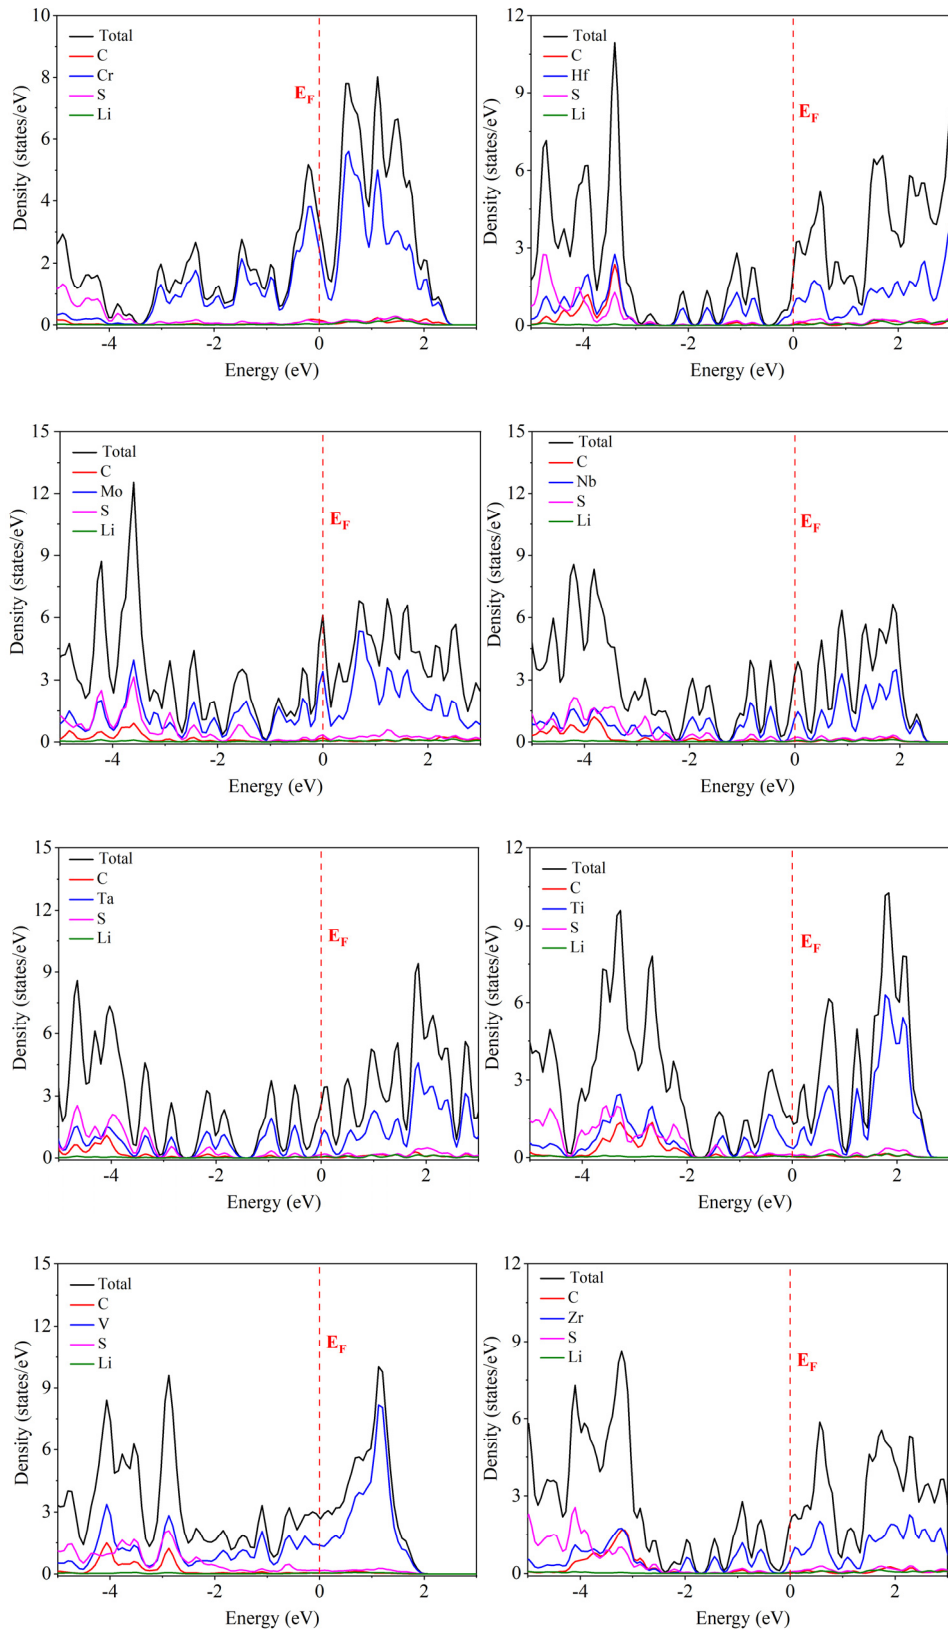

Fig. S4 Total and partial density of states of  $M_2CS_2Li_2$

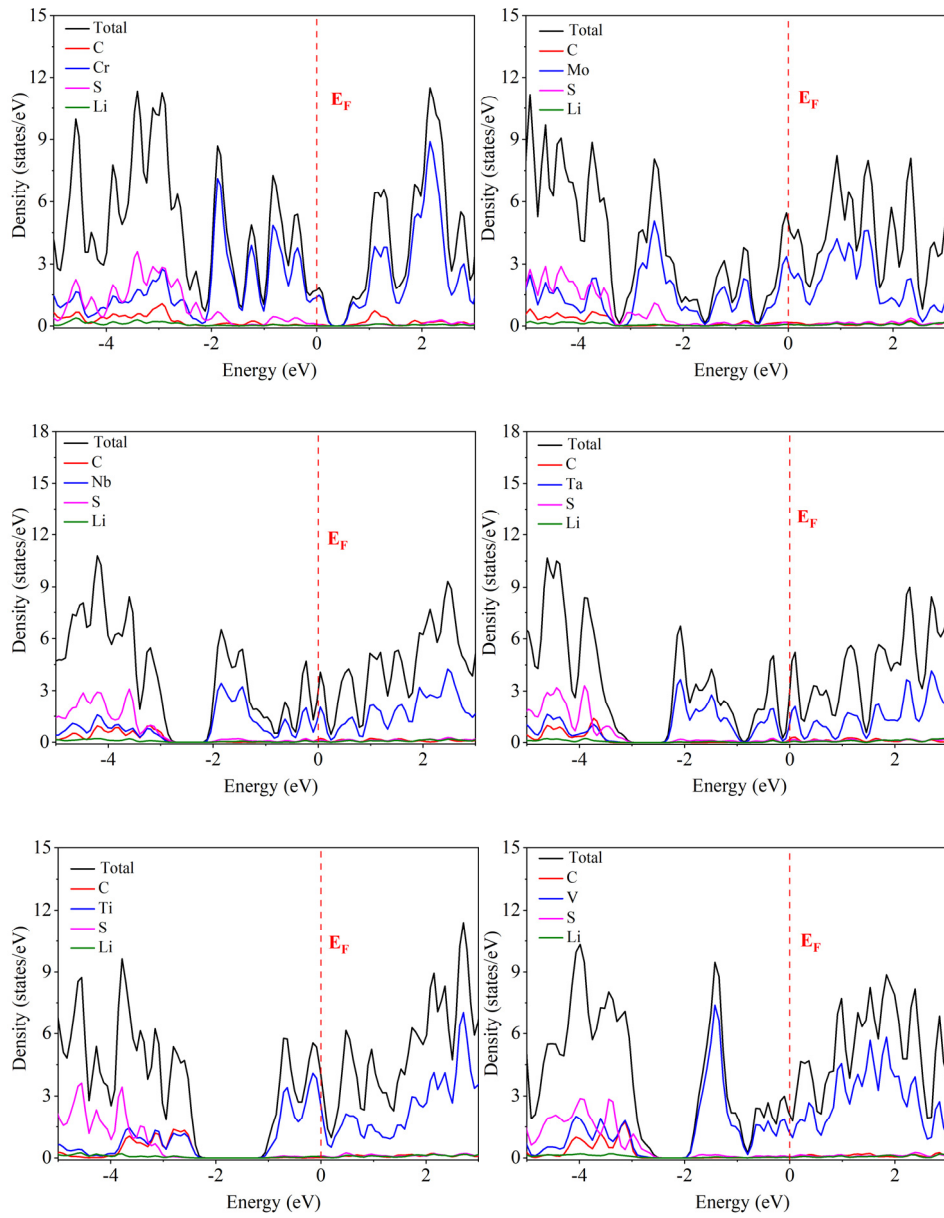

Fig. S5 Total and partial density of states of  $M_2CS_2Li_4$
